# Supplementary material
Source: Springer Nature journal article supplement (https://www.springermedizin.de/resource/supplementary/12885_2013_4492_MOESM4_ESM.pdf/9466502)

**a**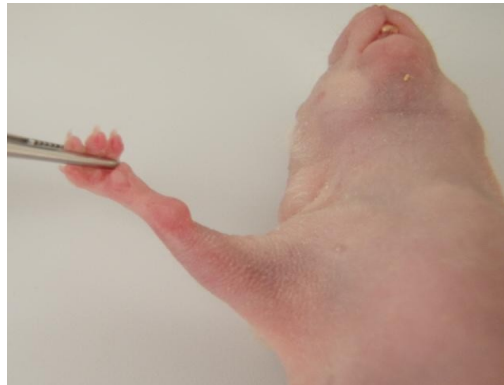**b**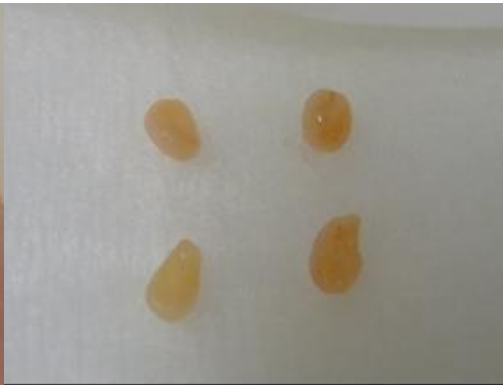**c****x40**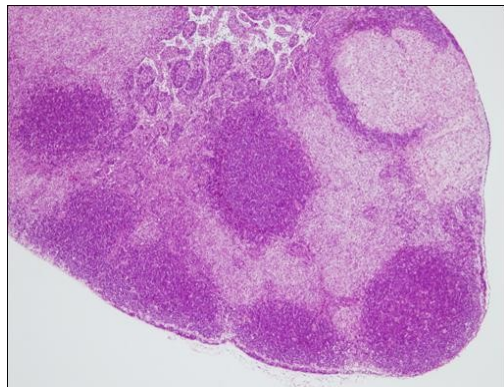**x100**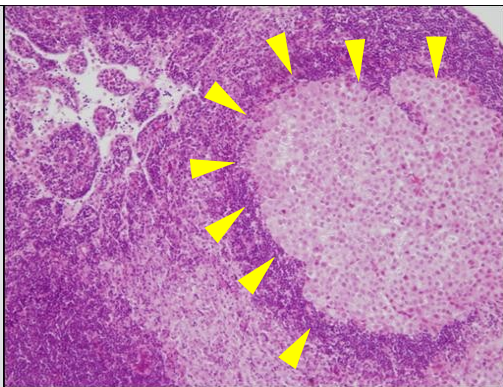**d**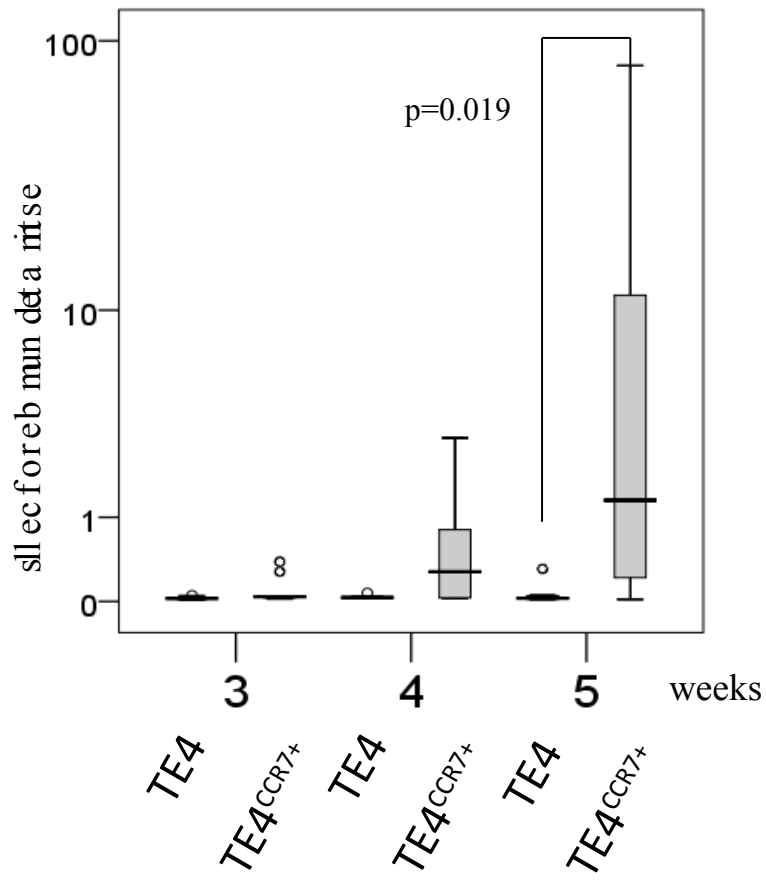

Supplement: MOESM4 [file 9466502]
